# Supplementary figures and images for: Identification of dual positive CD19+/CD3+ T cells in a leukapheresis product undergoing CAR transduction: a case report
Source: PubMed Central journal article supplement — J Immunother Cancer. 2020 Sep 14;8(2):e001073. doi: 10.1136/jitc-2020-001073 (PMC7490929; doi:10.1136/jitc-2020-001073), 2020-09-14

**Supplemental Figure 1.**

**A. Bone Marrow (D175 Post-HSCT)**

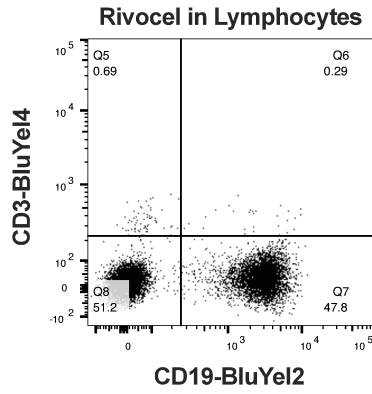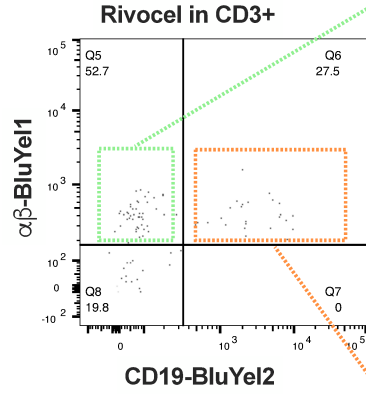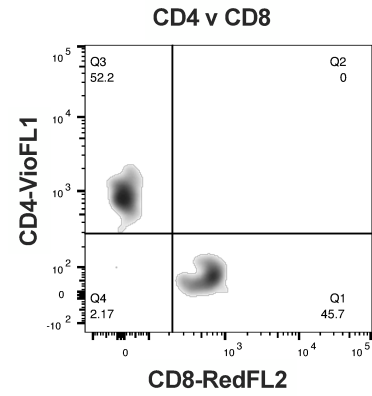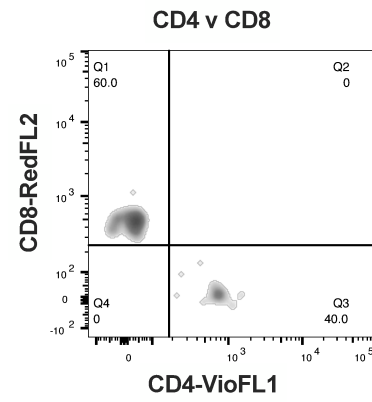

**B. Peripheral Blood (D173 Post-HSCT)**

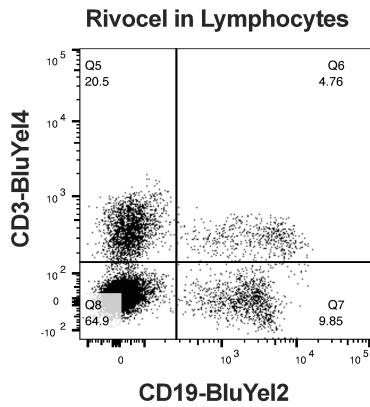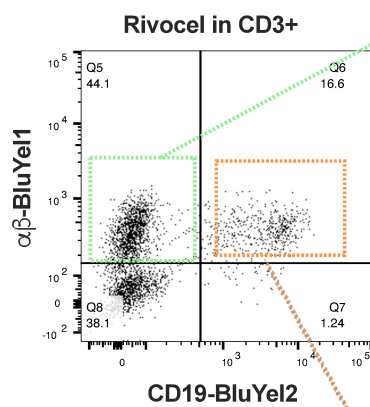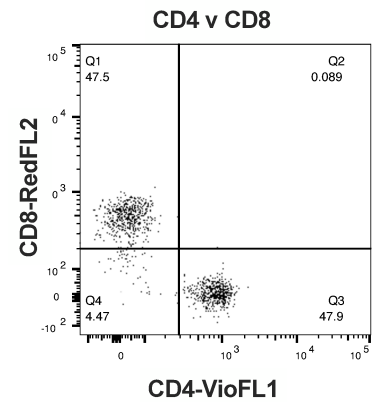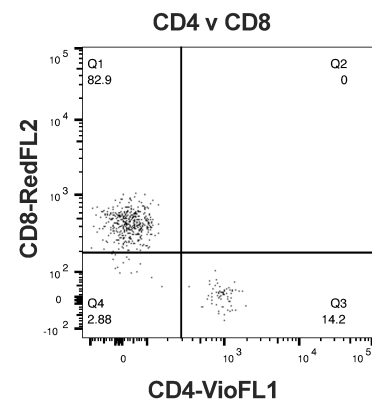

Supplement: jitc-2020-001073supp001.pdf [file jitc-2020-001073supp001.pdf]
